# Supplementary material
Source: PubMed Central journal article supplement (PMC4351661)
Supplement: supp_WNL.0000000000001315_Table_e-1.pdf [file supp_WNL.0000000000001315_Table_e-1.pdf]

| Paper                              | PMID     | Population            | PD    |      |        |               |         | Control                                                      |       |      |        |               |         | Data status |                               |     |          |             |     |    |
|------------------------------------|----------|-----------------------|-------|------|--------|---------------|---------|--------------------------------------------------------------|-------|------|--------|---------------|---------|-------------|-------------------------------|-----|----------|-------------|-----|----|
|                                    |          |                       | Total | mild | severe | homo/compound | unknown | details                                                      | Total | mild | severe | homo/compound | unknown | details     | comments                      | AAO | Mutation | Severe/mild | AAO | SD |
| Aharon 2004<br>NEJM                | 15525722 | Ashkenazi-<br>Jews    | 99    | 24   | 4      | 3             |         | N370S/N370S<br>- 3, N370S/wt<br>- 23, R496H -<br>1, 84GG - 4 | 1543  | 92   | 3      |               |         |             | N370S/wt<br>- 92,<br>84GG - 3 |     | no data  |             |     |    |
| Sato 2005<br>Mov disord            | 15517592 | Caucasian<br>Canadian | 88    | 1    | 4      |               |         | N370S/wt - 1,<br>L444P - 1,<br>RecTI - 3                     | 122   | 1    |        |               |         |             | N370S/wt<br>- 1               |     | N370S    | mild        | 52  |    |
|                                    |          |                       |       |      |        |               |         |                                                              |       |      |        |               |         |             |                               |     | RecNcil  | Severe      | 31  |    |
|                                    |          |                       |       |      |        |               |         |                                                              |       |      |        |               |         |             |                               |     | RecNcil  | Severe      | 38  |    |
|                                    |          |                       |       |      |        |               |         |                                                              |       |      |        |               |         |             |                               |     | RecNcil  | Severe      | 35  |    |
|                                    |          |                       |       |      |        |               |         |                                                              |       |      |        |               |         |             |                               |     | L444P    | Severe      | 32  |    |
| Eblan 2006<br>Mov disord           | 16261622 | Venezuela             | 33    | 1    | 3      |               |         | N370S/wt - 1,<br>RecNcil - 2,<br>L444P - 1                   | 31    |      |        |               |         |             | D443N -<br>1 1                |     | N370S    | mild        | 29  |    |
|                                    |          |                       |       |      |        |               |         |                                                              |       |      |        |               |         |             |                               |     | RecNcil  | Severe      | 34  |    |
|                                    |          |                       |       |      |        |               |         |                                                              |       |      |        |               |         |             |                               |     | RecNcil  | Severe      | 36  |    |
|                                    |          |                       |       |      |        |               |         |                                                              |       |      |        |               |         |             |                               |     | L444P    | Severe      | 47  |    |
| Toft 2006<br>Neurology             | 16476943 | Norway                | 311   | 4    | 3      |               |         | N370S/wt - 4,<br>L444P - 3                                   | 474   | 7    | 1      |               |         |             | N370S/wt<br>- 7,<br>L444P - 1 |     | N370S    | mild        | 63  |    |
|                                    |          |                       |       |      |        |               |         |                                                              |       |      |        |               |         |             |                               |     | N370S    | mild        | 40  |    |
|                                    |          |                       |       |      |        |               |         |                                                              |       |      |        |               |         |             |                               |     | N370S    | mild        | 62  |    |
|                                    |          |                       |       |      |        |               |         |                                                              |       |      |        |               |         |             |                               |     | N370S    | mild        | 49  |    |
|                                    |          |                       |       |      |        |               |         |                                                              |       |      |        |               |         |             |                               |     | L444P    | severe      | 55  |    |
|                                    |          |                       |       |      |        |               |         |                                                              |       |      |        |               |         |             |                               |     | L444P    | severe      | 59  |    |
|                                    |          |                       |       |      |        |               |         |                                                              |       |      |        |               |         |             |                               |     | L444P    | severe      | 70  |    |
| Ziegler 2007<br>Mol Genet<br>Metab | 17462935 | Chinese               | 92    |      | 2      |               |         | L444P - 1,<br>D409H - 1,<br>L174P - 1,<br>Q497R - 1          | 92    |      |        |               |         |             | V460M -<br>1 1                |     | L174P    | unknown     | 58  |    |
|                                    |          |                       |       |      |        |               |         |                                                              |       |      |        |               |         |             |                               |     | Q497R    | unknown     | 63  |    |
|                                    |          |                       |       |      |        |               |         |                                                              |       |      |        |               |         |             |                               |     | L444P    | severe      | 64  |    |
|                                    |          |                       |       |      |        |               |         |                                                              |       |      |        |               |         |             |                               |     | D409H    | severe      | 67  |    |

|                                                                               |                                                                        |            |                                                                                                                                                                                                                                                                                                                                                                                     |
|-------------------------------------------------------------------------------|------------------------------------------------------------------------|------------|-------------------------------------------------------------------------------------------------------------------------------------------------------------------------------------------------------------------------------------------------------------------------------------------------------------------------------------------------------------------------------------|
| <p>Tan 2007<br/>Arch Neurol</p> <p>17620502 Chinese</p>                       | <p>331</p> <p>8</p> <p>L444P - 8</p>                                   | <p>347</p> | <p>L444P severe 40</p> <p>L444P severe 43</p> <p>L444P severe 44</p> <p>L444P severe 60</p> <p>L444P severe 29</p> <p>L444P severe 58</p> <p>L444P severe 45</p> <p>L444P severe 70</p>                                                                                                                                                                                             |
| <p>Wu 2007 J<br/>Neurol<br/>Neuroserg<br/>Psych</p> <p>17702778 Taiwanese</p> | <p>518</p> <p>16</p> <p>L444P - 13,<br/>RecNcil - 2,<br/>R120W - 1</p> | <p>339</p> | <p>L444P severe 60</p> <p>L444P severe 29</p> <p>L444P severe 57</p> <p>L444P severe 57</p> <p>L444P severe 46</p> <p>L444P severe 64</p> <p>L444P severe 67</p> <p>L444P severe 55</p> <p>L444P severe 46</p> <p>L444P severe 64</p> <p>L444P severe 30</p> <p>L444P severe 50</p> <p>L444P severe 40</p> <p>RecNcil severe 34</p> <p>RecNcil severe 49</p> <p>R120W severe 62</p> |
| <p>Spitz 2007<br/>Parkinsonism<br/>relat disord</p> <p>17703984 Brazilian</p> | <p>65</p> <p>2</p> <p>L444P - 1,<br/>L444P +<br/>E326K - 1</p>         | <p>267</p> | <p>L444P severe 46</p> <p>L444P + E326K severe 42</p>                                                                                                                                                                                                                                                                                                                               |

|                                 |          |                  |     |    |    |   |   |                                                                                                                                  |     |   |                                             |   |              |                                                                                                                                                                                                                                                                                                                                                                                       |
|---------------------------------|----------|------------------|-----|----|----|---|---|----------------------------------------------------------------------------------------------------------------------------------|-----|---|---------------------------------------------|---|--------------|---------------------------------------------------------------------------------------------------------------------------------------------------------------------------------------------------------------------------------------------------------------------------------------------------------------------------------------------------------------------------------------|
| Clark 2007<br>Neurology         | 17875915 | Jewish           | 178 | 21 | 5  | 3 | 1 | 84GG - 5,<br>N370S - 21<br>(including 2<br>homozygotes),<br>R496H - 1,<br>T369M - 1,<br>E326K - 1,<br>P175P - 1<br>(homozygote), | 85  | 4 | N370S -<br>3, T369M<br>- 2,<br>E326K -<br>1 | 2 | 1            | no data                                                                                                                                                                                                                                                                                                                                                                               |
|                                 |          | Non-<br>Jewish   | 100 | 2  | 4  |   | 2 | N370S - 2,<br>T369M - 2,<br>RecNcil - 1,<br>D409H - 1,<br>L444P - 2                                                              | 94  |   | T369M -<br>1, ?                             | 2 |              | no data                                                                                                                                                                                                                                                                                                                                                                               |
| De Marco<br>2008 Mov<br>disord  | 18074383 | South Italy      | 395 | 3  | 8  |   |   | N370S - 3,<br>L444P - 8                                                                                                          | 483 | 1 |                                             |   | L444P - 1    | no data                                                                                                                                                                                                                                                                                                                                                                               |
| Mata 2008<br>Arch Neurol        | 18332251 | North<br>America | 721 | 11 | 10 |   |   | N370S - 11,<br>L444P - 10                                                                                                        | 554 | 2 |                                             |   | N370S -<br>2 | N370S mild 47<br>N370S mild 65<br>N370S mild 54<br>N370S mild 52<br>N370S mild 58<br>N370S mild 73<br>N370S mild 43<br>N370S mild 48<br>N370S mild 50<br>N370S mild 60<br>N370S mild 82<br>L444P Severe 48<br>L444P Severe 60<br>L444P Severe 72<br>L444P Severe 57<br>L444P Severe 51<br>L444P Severe 64<br>L444P Severe 42<br>L444P Severe 61<br>L444P Severe 64<br>L444P Severe 36 |
| Bras 2009<br>Neurobiol<br>Aging | 18160183 | Portugal         | 230 | 10 | 4  |   |   | N370S - 5,<br>N396T - 5,<br>L444P - 3,<br>D409H - 1                                                                              | 430 | 3 |                                             |   | N370S -<br>3 | no data                                                                                                                                                                                                                                                                                                                                                                               |

Neumann  
2009 Brain 19286695 UK

790 8 19

L444P - 11,  
D443N - 1,  
R463C - 3,  
RecNcil - 2,  
RecA456P - 1,  
N370S - 8,  
D409H - 1,  
D380A - 1,  
del55 - 1,  
R257Q - 1,  
G193E - 1,  
R131C - 1,  
K7E - 1

6

257 1 1

N370S -  
1, R257Q  
- 1,  
V458L - 1

1

|          |         |    |
|----------|---------|----|
| L444P    | Severe  | 34 |
| K7E      | unknown | 48 |
| L444P    | Severe  | 43 |
| N370S    | mild    | 57 |
| N370S    | mild    | 54 |
| L444P    | Severe  | 41 |
| N370S    | mild    | 53 |
| N370S    | mild    | 57 |
| D380A    | Severe  | 56 |
| D443N    | unknown | 43 |
| del55    | Severe  | 26 |
| G193E    | unknown | 49 |
| R131C    | Severe  | 56 |
| N370S    | mild    | 69 |
| L444P    | Severe  | 50 |
| RecA456P | unknown | 48 |
| R463C    | Severe  | 61 |
| R463C    | Severe  | 35 |
| N370S    | mild    | 79 |
| N370S    | mild    | 64 |
| L444P    | Severe  | 60 |
| R463C    | Severe  | 61 |
| L444P    | Severe  | 57 |
| D409H    | Severe  | 44 |
| R257Q    | Severe  | 58 |
| L444P    | Severe  | 58 |
| RecNcil  | Severe  | 58 |
| L444P    | Severe  | 52 |
| L444P    | Severe  | 37 |
| N370S    | mild    | 68 |
| L444P    | Severe  | 59 |

|                                   |          |                  |     |   |    |   |                                                                                                                                                                   |     |   |   |                                          |                                                                                                                                                                                                                               |                  |                |
|-----------------------------------|----------|------------------|-----|---|----|---|-------------------------------------------------------------------------------------------------------------------------------------------------------------------|-----|---|---|------------------------------------------|-------------------------------------------------------------------------------------------------------------------------------------------------------------------------------------------------------------------------------|------------------|----------------|
| Kalinderi<br>2009<br>Neurosci Let | 19383421 | Greek            | 172 | 2 | 7  | 2 | L444P - 2,<br>D409H - 1,<br>E326K - 1,<br>H255Q - 4,<br>R329H - 1,<br>S271G - 1,<br>T482K - 1                                                                     | 132 | 1 | 3 | E326K -<br>1, T482K<br>- 1,<br>V460L - 2 | no data                                                                                                                                                                                                                       |                  |                |
| Mitsui 2009<br>Arch Neurol        | 19433656 | Japanese         | 534 | 6 | 39 | 5 | R120W - 15,<br>R131C - 1,<br>N188S - 4,<br>R120W rec -<br>1, G193W - 1,<br>F213I - 1,<br>R329C - 2,<br>L444P - 8,<br>RecNcil - 14,<br>A456P rec - 1,<br>R496C - 2 | 544 |   | 2 | RecNcil -<br>2                           | R120W<br>(15<br>patients)<br><br>L444P +<br>RecNcil<br>(22<br>patients)<br><br>Severe<br><br>Severe                                                                                                                           | 51.8<br><br>52.6 | 8.2<br><br>6.9 |
| Mao 2009<br>Neurosci Let          | 20004703 | Chinese          | 616 |   | 20 |   | L444P - 1                                                                                                                                                         | 411 |   | 1 | L444P - 1                                | L444P<br>(20<br>patients)<br><br>Severe                                                                                                                                                                                       | 54.9             | 11.97          |
| Sun 2010<br>Mov disord            | 20131388 | Chinese          | 402 |   | 11 |   | L444P - 11                                                                                                                                                        | 413 |   |   |                                          | L444P<br>Severe<br>53<br>L444P<br>Severe<br>59<br>L444P<br>Severe<br>59<br>L444P<br>Severe<br>59<br>L444P<br>Severe<br>68<br>L444P<br>Severe<br>55<br>L444P<br>Severe<br>53<br>L444P<br>Severe<br>60<br>L444P<br>Severe<br>41 |                  |                |
| Lesage 2011<br>Neurology          | 21242499 | North<br>African | 194 | 2 | 5  | 2 | K(-27)R - 2,<br>R131C - 2,<br>N370S - 2,<br>L444Prec - 1,<br>RecNcil - 2                                                                                          | 177 |   | 1 | D443N                                    | K(-27)R<br>unknown<br>36<br>K(-27)R<br>unknown<br>64<br>R131C<br>Severe<br>38<br>R131C<br>Severe<br>41<br>N370S<br>mild<br>50<br>N370S<br>mild<br>56                                                                          |                  |                |

|                                 |          |                 |      |    |    |   |    |                                                                                                                                                                                                                                                                                                                                                                                      |     |   |   |                                                     |                           |                                          |         |        |      |
|---------------------------------|----------|-----------------|------|----|----|---|----|--------------------------------------------------------------------------------------------------------------------------------------------------------------------------------------------------------------------------------------------------------------------------------------------------------------------------------------------------------------------------------------|-----|---|---|-----------------------------------------------------|---------------------------|------------------------------------------|---------|--------|------|
|                                 |          |                 |      |    |    |   |    |                                                                                                                                                                                                                                                                                                                                                                                      |     |   |   | L444P-E326K complex allele                          | Severe                    | 34                                       |         |        |      |
|                                 |          |                 |      |    |    |   |    |                                                                                                                                                                                                                                                                                                                                                                                      |     |   |   | RecNcil                                             | Severe                    | 61                                       |         |        |      |
|                                 |          |                 |      |    |    |   |    |                                                                                                                                                                                                                                                                                                                                                                                      |     |   |   | RecNcil                                             | Severe                    | 69                                       |         |        |      |
| Lesage 2011<br>Hum Mol Genet    | 20947659 | European        | 1130 | 37 | 24 | 5 | 10 | K(-27)R - 1,<br>G80R - 1,<br>I119L - 1,<br>R120W - 1,<br>S125N - 1,<br>R131C - 1,<br>S173fs - 1,<br>G202R - 2,<br>P246L - 1,<br>Y304C - 1,<br>T323I - 1,<br>R329C - 2,<br>S364N - 1,<br>N370S - 33,<br>G377S - 1,<br>E388K - 1,<br>D409H - 1,<br>L444P - 11,<br>P452L - 1,<br>R463C - 1,<br>R463H - 1,<br>G112A - 1,<br>RecNcil - 2,<br>L444Prec - 1,<br>RecTL - 1,<br>D104H rec - 1 | 391 | 3 |   | K79M - 1,<br>N370S - 2,<br>G377S                    | 1                         | - 1                                      | no data |        |      |
| Huang 2011<br>Eur J Neurol      | 21338444 | Taiwanese       | 967  |    | 36 |   |    | D409H - 2,<br>L444P - 27,<br>RecNcil - 7                                                                                                                                                                                                                                                                                                                                             | 780 |   | 2 | L444P - 1,<br>RecNcil - 1                           | All carriers (all severe) | D409H - 2,<br>L444P - 27,<br>RecNcil - 7 | Severe  | 49.69  | 11.3 |
| Noreau 2011<br>Can J Neurol Sci | 21856586 | French Canadian | 212  | 5  | 6  |   | 11 | L197F - 1,<br>E326K - 5,<br>S339L - 1,<br>T369M - 9,<br>W378G - 1,<br>L444P - 5                                                                                                                                                                                                                                                                                                      | 189 | 5 | 1 | N370S - 2,<br>E326K - 3,<br>T369M - 5,<br>L444P - 1 | 5                         | - 1                                      | no data |        |      |
| Moraitou 2011<br>Genet Metab    | 21745757 | Greek           | 205  | 6  | 15 |   |    | N370S - 6,<br>L444P - 6,<br>H255Q - 1,<br>D409H - 1,<br>D409H+ - 6,<br>IVS10-1 - 1                                                                                                                                                                                                                                                                                                   | 206 | 4 | 2 | N370S - 4,<br>L444P - 1,<br>H255Q - 1,<br>Y108C - 1 | 1                         | - 1                                      | H255Q   | Severe | 58   |
|                                 |          |                 |      |    |    |   |    |                                                                                                                                                                                                                                                                                                                                                                                      |     |   |   |                                                     |                           |                                          | N370S   | mild   | 40   |
|                                 |          |                 |      |    |    |   |    |                                                                                                                                                                                                                                                                                                                                                                                      |     |   |   |                                                     |                           |                                          | N370S   | mild   | 53   |
|                                 |          |                 |      |    |    |   |    |                                                                                                                                                                                                                                                                                                                                                                                      |     |   |   |                                                     |                           |                                          | N370S   | mild   | 60   |



|                                                   |          |           |     |   |    |   |                                                                                                             |     |   |  |                                             |                                                                      |         |         |      |      |
|---------------------------------------------------|----------|-----------|-----|---|----|---|-------------------------------------------------------------------------------------------------------------|-----|---|--|---------------------------------------------|----------------------------------------------------------------------|---------|---------|------|------|
|                                                   |          |           |     |   |    |   |                                                                                                             |     |   |  |                                             | D409H                                                                | Severe  | 50      |      |      |
|                                                   |          |           |     |   |    |   |                                                                                                             |     |   |  |                                             | D409H                                                                | Severe  | 56      |      |      |
|                                                   |          |           |     |   |    |   |                                                                                                             |     |   |  |                                             | L444P                                                                | Severe  | 56      |      |      |
|                                                   |          |           |     |   |    |   |                                                                                                             |     |   |  |                                             | L444P                                                                | Severe  | 56      |      |      |
|                                                   |          |           |     |   |    |   |                                                                                                             |     |   |  |                                             | L444P                                                                | Severe  | 48      |      |      |
|                                                   |          |           |     |   |    |   |                                                                                                             |     |   |  |                                             | L444P                                                                | Severe  | 57      |      |      |
|                                                   |          |           |     |   |    |   |                                                                                                             |     |   |  |                                             | L444P                                                                | Severe  | 48      |      |      |
|                                                   |          |           |     |   |    |   |                                                                                                             |     |   |  |                                             | L444P                                                                | Severe  | 46      |      |      |
|                                                   |          |           |     |   |    |   |                                                                                                             |     |   |  |                                             | RecNcil                                                              | Severe  | 51      |      |      |
|                                                   |          |           |     |   |    |   |                                                                                                             |     |   |  |                                             | S488T                                                                | unknown | 56      |      |      |
| Emelyanov<br>2012 Mov<br>Disord                   | 21915911 | Russian   | 330 | 3 | 6  |   | N370S - 3,<br>L444P - 6                                                                                     | 240 | 1 |  | L444P - 1                                   | no data                                                              |         |         |      |      |
| Guimarães<br>2012<br>Parkinsonism<br>relat disord | 22192918 | Brazilian | 347 | 5 | 8  |   | N370S - 5,<br>L444P - 8                                                                                     | 341 |   |  |                                             | N370S<br>(5<br>patients)                                             | N370S   | mild    | 54.6 | 13.3 |
|                                                   |          |           |     |   |    |   |                                                                                                             |     |   |  |                                             | L444P<br>(8<br>patients)                                             | L444P   | severe  | 47   | 9.6  |
| Kumar 2012<br>Eur J Neurol                        | 22812582 | Serbian   | 360 | 7 | 10 | 2 | N370S - 7,<br>D409H - 6,<br>L444P - 2,<br>R463C -1,<br>RecNCil - 1                                          | 348 | 3 |  | D409H -<br>2, L444P<br>- 1,<br>A456P -<br>1 | All mild<br>carriers<br>(n=7)<br>All<br>severe<br>carriers<br>(n=10) | mild    | 56.17   | 7.63 |      |
|                                                   |          |           |     |   |    |   |                                                                                                             |     |   |  |                                             |                                                                      | Severe  | 45.1    | 8.32 |      |
| Choi 2012<br>Neurosci let                         | 22387070 | Korean    | 277 | 3 | 7  | 2 | R163Q - 1,<br>N188S - 1,<br>P201H - 1,<br>P257Q - 3,<br>S271G - 2,<br>R277C - 1,<br>F347L - 1,<br>L444P - 2 | 291 |   |  |                                             |                                                                      | R163Q   | unknown | 42   |      |
|                                                   |          |           |     |   |    |   |                                                                                                             |     |   |  |                                             |                                                                      | N188S   | Severe  | 35   |      |
|                                                   |          |           |     |   |    |   |                                                                                                             |     |   |  |                                             |                                                                      | P201H   | Severe  | 37   |      |
|                                                   |          |           |     |   |    |   |                                                                                                             |     |   |  |                                             |                                                                      | R257Q   | Severe  | 46   |      |
|                                                   |          |           |     |   |    |   |                                                                                                             |     |   |  |                                             |                                                                      | R257Q   | Severe  | 73   |      |
|                                                   |          |           |     |   |    |   |                                                                                                             |     |   |  |                                             |                                                                      | R257Q   | Severe  | 58   |      |
|                                                   |          |           |     |   |    |   |                                                                                                             |     |   |  |                                             |                                                                      | S271G   | mild    | 49   |      |
|                                                   |          |           |     |   |    |   |                                                                                                             |     |   |  |                                             |                                                                      | S271G   | mild    | 54   |      |
|                                                   |          |           |     |   |    |   |                                                                                                             |     |   |  |                                             |                                                                      | R277C   | mild    | 62   |      |
|                                                   |          |           |     |   |    |   |                                                                                                             |     |   |  |                                             |                                                                      | F347L   | unknown | 39   |      |
|                                                   |          |           |     |   |    |   |                                                                                                             |     |   |  |                                             |                                                                      | L444P   | Severe  | 40   |      |
|                                                   |          |           |     |   |    |   |                                                                                                             |     |   |  |                                             |                                                                      | L444P   | Severe  | 45   |      |



|               |                  |      |                                                                            |    |    |                                                                                                                                         |      |     |    |   |                                                                    |       |      |    |
|---------------|------------------|------|----------------------------------------------------------------------------|----|----|-----------------------------------------------------------------------------------------------------------------------------------------|------|-----|----|---|--------------------------------------------------------------------|-------|------|----|
| Current study | Ashkenazi-Jewish | 1000 | 136<br>(including 13 carriers of LRRK2 G2019S mutation, should be omitted) | 44 | 12 | 84GG - 21, IVS2+1 - 5, L444P - 3, N370S - 120 including 11 LRRK2 carriers, R496H - 16 including 2 LRRK2 carriers), RecTL - 8, V394L - 7 | 3805 | 224 | 17 | 1 | N370S - 224, 84GG - 6, IVS2+1 - 1, V394L - 4, L444P - 4, RecTL - 2 | N370S | mild | 50 |
|               |                  |      |                                                                            |    |    |                                                                                                                                         |      |     |    |   |                                                                    | N370S | mild | 41 |
|               |                  |      |                                                                            |    |    |                                                                                                                                         |      |     |    |   |                                                                    | N370S | mild | 56 |
|               |                  |      |                                                                            |    |    |                                                                                                                                         |      |     |    |   |                                                                    | N370S | mild | 61 |
|               |                  |      |                                                                            |    |    |                                                                                                                                         |      |     |    |   |                                                                    | N370S | mild | 39 |
|               |                  |      |                                                                            |    |    |                                                                                                                                         |      |     |    |   |                                                                    | N370S | mild | 53 |
|               |                  |      |                                                                            |    |    |                                                                                                                                         |      |     |    |   |                                                                    | N370S | mild | 50 |
|               |                  |      |                                                                            |    |    |                                                                                                                                         |      |     |    |   |                                                                    | N370S | mild | 50 |
|               |                  |      |                                                                            |    |    |                                                                                                                                         |      |     |    |   |                                                                    | N370S | mild | 48 |
|               |                  |      |                                                                            |    |    |                                                                                                                                         |      |     |    |   |                                                                    | N370S | mild | 69 |
|               |                  |      |                                                                            |    |    |                                                                                                                                         |      |     |    |   |                                                                    | N370S | mild | 72 |
|               |                  |      |                                                                            |    |    |                                                                                                                                         |      |     |    |   |                                                                    | N370S | mild | 77 |
|               |                  |      |                                                                            |    |    |                                                                                                                                         |      |     |    |   |                                                                    | N370S | mild | 76 |
|               |                  |      |                                                                            |    |    |                                                                                                                                         |      |     |    |   |                                                                    | N370S | mild | 46 |
|               |                  |      |                                                                            |    |    |                                                                                                                                         |      |     |    |   |                                                                    | N370S | mild | 56 |
|               |                  |      |                                                                            |    |    |                                                                                                                                         |      |     |    |   |                                                                    | N370S | mild | 70 |
|               |                  |      |                                                                            |    |    |                                                                                                                                         |      |     |    |   |                                                                    | N370S | mild | 48 |
|               |                  |      |                                                                            |    |    |                                                                                                                                         |      |     |    |   |                                                                    | N370S | mild | 58 |
|               |                  |      |                                                                            |    |    |                                                                                                                                         |      |     |    |   |                                                                    | N370S | mild | 50 |
|               |                  |      |                                                                            |    |    |                                                                                                                                         |      |     |    |   |                                                                    | N370S | mild | 69 |
|               |                  |      |                                                                            |    |    |                                                                                                                                         |      |     |    |   |                                                                    | N370S | mild | 35 |
|               |                  |      |                                                                            |    |    |                                                                                                                                         |      |     |    |   |                                                                    | N370S | mild | 55 |
|               |                  |      |                                                                            |    |    |                                                                                                                                         |      |     |    |   |                                                                    | N370S | mild | 43 |
|               |                  |      |                                                                            |    |    |                                                                                                                                         |      |     |    |   |                                                                    | N370S | mild | 72 |
|               |                  |      |                                                                            |    |    |                                                                                                                                         |      |     |    |   |                                                                    | N370S | mild | 55 |
|               |                  |      |                                                                            |    |    |                                                                                                                                         |      |     |    |   |                                                                    | N370S | mild | 57 |
|               |                  |      |                                                                            |    |    |                                                                                                                                         |      |     |    |   |                                                                    | N370S | mild | 68 |
|               |                  |      |                                                                            |    |    |                                                                                                                                         |      |     |    |   |                                                                    | N370S | mild | 59 |
|               |                  |      |                                                                            |    |    |                                                                                                                                         |      |     |    |   |                                                                    | N370S | mild | 51 |
|               |                  |      |                                                                            |    |    |                                                                                                                                         |      |     |    |   |                                                                    | N370S | mild | 78 |
|               |                  |      |                                                                            |    |    |                                                                                                                                         |      |     |    |   |                                                                    | N370S | mild | 44 |
|               |                  |      |                                                                            |    |    |                                                                                                                                         |      |     |    |   |                                                                    | N370S | mild | 62 |
|               |                  |      |                                                                            |    |    |                                                                                                                                         |      |     |    |   |                                                                    | N370S | mild | 46 |
|               |                  |      |                                                                            |    |    |                                                                                                                                         |      |     |    |   |                                                                    | N370S | mild | 67 |
|               |                  |      |                                                                            |    |    |                                                                                                                                         |      |     |    |   |                                                                    | N370S | mild | 69 |

|       |      |    |
|-------|------|----|
| N370S | mild | 71 |
| N370S | mild | 57 |
| N370S | mild | 71 |
| N370S | mild | 55 |
| N370S | mild | 53 |
| N370S | mild | 60 |
| N370S | mild | 65 |
| N370S | mild | 72 |
| N370S | mild | 56 |
| N370S | mild | 59 |
| N370S | mild | 30 |
| N370S | mild | 47 |
| N370S | mild | 62 |
| N370S | mild | 51 |
| N370S | mild | 54 |
| N370S | mild | 46 |
| N370S | mild | 66 |
| N370S | mild | 47 |
| N370S | mild | 69 |
| N370S | mild | 70 |
| N370S | mild | 76 |
| N370S | mild | 66 |
| N370S | mild | 50 |
| N370S | mild | 64 |
| N370S | mild | 74 |
| N370S | mild | 64 |
| N370S | mild | 61 |
| N370S | mild | 66 |
| N370S | mild | 52 |
| N370S | mild | 60 |
| N370S | mild | 79 |
| N370S | mild | 52 |
| N370S | mild | 54 |
| N370S | mild | 64 |
| N370S | mild | 44 |
| N370S | mild | 58 |
| N370S | mild | 56 |
| N370S | mild | 54 |
| N370S | mild | 55 |
| N370S | mild | 63 |
| N370S | mild | 51 |
| N370S | mild | 60 |
| N370S | mild | 43 |
| N370S | mild | 73 |
| N370S | mild | 67 |

|       |        |    |
|-------|--------|----|
| N370S | mild   | 63 |
| N370S | mild   | 40 |
| N370S | mild   | 56 |
| N370S | mild   | 66 |
| N370S | mild   | 74 |
| N370S | mild   | 75 |
| N370S | mild   | 62 |
| N370S | mild   | 52 |
| N370S | mild   | 59 |
| N370S | mild   | 58 |
| N370S | mild   | 59 |
| N370S | mild   | 70 |
| N370S | mild   | 76 |
| N370S | mild   | 57 |
| N370S | mild   | 58 |
| N370S | mild   | 39 |
| N370S | mild   | 66 |
| N370S | mild   | 56 |
| N370S | mild   | 44 |
| N370S | mild   | 71 |
| N370S | mild   | 73 |
| N370S | mild   | 52 |
| N370S | mild   | 39 |
| N370S | mild   | 65 |
| N370S | mild   | 53 |
| N370S | mild   | 63 |
| N370S | mild   | 67 |
| N370S | mild   | 78 |
| R496H | mild   | 67 |
| R496H | mild   | 48 |
| R496H | mild   | 46 |
| R496H | mild   | 50 |
| R496H | mild   | 64 |
| R496H | mild   | 55 |
| R496H | mild   | 73 |
| R496H | mild   | 54 |
| R496H | mild   | 64 |
| R496H | mild   | 73 |
| R496H | mild   | 55 |
| R496H | mild   | 53 |
| R496H | mild   | 62 |
| R496H | mild   | 50 |
| 84GG  | severe | 56 |
| 84GG  | severe | 64 |
| 84GG  | severe | 54 |

|               |        |    |
|---------------|--------|----|
| 84GG          | severe | 55 |
| 84GG          | severe | 53 |
| 84GG          | severe | 43 |
| 84GG          | severe | 72 |
| 84GG          | severe | 71 |
| 84GG          | severe | 70 |
| 84GG          | severe | 44 |
| 84GG          | severe | 48 |
| 84GG          | severe | 49 |
| 84GG          | severe | 68 |
| 84GG          | severe | 46 |
| 84GG          | severe | 61 |
| 84GG          | severe | 41 |
| 84GG          | severe | 64 |
| 84GG          | severe | 73 |
| 84GG          | severe | 54 |
| 84GG          | severe | 60 |
| 84GG          | severe | 61 |
| IVS2+1        | severe | 47 |
| IVS2+1        | severe | 46 |
| IVS2+1        | severe | 69 |
| IVS2+1        | severe | 61 |
| IVS2+1        | severe | 52 |
| L444P         | severe | 50 |
| L444P         | severe | 60 |
| L444P         | severe | 72 |
| RecTL,N370S/+ | severe | 55 |
| RecTL,N370S/+ | severe | 55 |
| RecTL,N370S/+ | severe | 44 |
| RecTL,N370S/+ | severe | 60 |
| RecTL,N370S/+ | severe | 52 |
| RecTL,N370S/+ | severe | 58 |
| RecTL,N370S/+ | severe | 62 |
| RecTL,N370S/+ | severe | 57 |
| V394L         | severe | 45 |
| V394L         | severe | 46 |
| V394L         | severe | 67 |
| V394L         | severe | 74 |
| V394L         | severe | 49 |

|                                                   |          |                    |     |   |           |     |   |           |                                                                        |         |        |    |
|---------------------------------------------------|----------|--------------------|-----|---|-----------|-----|---|-----------|------------------------------------------------------------------------|---------|--------|----|
|                                                   |          |                    |     |   |           |     |   |           | V394L                                                                  | severe  | 35     |    |
|                                                   |          |                    |     |   |           |     |   |           | V394L                                                                  | severe  | 51     |    |
| Wang 2012<br>Behav Brain<br>Funct                 | 23227814 | Central<br>Chinese | 208 | 7 | L444P - 7 | 298 | 1 | L444P - 1 | Only<br>scanned<br>the<br>L444P,<br>N370S<br>and<br>R120W<br>mutations | no data |        |    |
| Zhang 2012<br>Chinese<br>Journal of<br>Physiology | 23286447 | Chinese            | 195 | 6 | L444P - 6 | 443 |   |           | Only<br>scanned<br>the<br>L444P,<br>N370S<br>and<br>R120W<br>mutations |         |        |    |
|                                                   |          |                    |     |   |           |     |   |           |                                                                        | L444P   | severe | 56 |
|                                                   |          |                    |     |   |           |     |   |           |                                                                        | L444P   | severe | 63 |
|                                                   |          |                    |     |   |           |     |   |           |                                                                        | L444P   | severe | 54 |
|                                                   |          |                    |     |   |           |     |   |           |                                                                        | L444P   | severe | 64 |
|                                                   |          |                    |     |   |           |     |   |           |                                                                        | L444P   | severe | 63 |
|                                                   |          |                    |     |   |           |     |   |           |                                                                        | L444P   | severe | 72 |
| Gonzalez-<br>Del Rincon<br>Mde 2013<br>Clin Genet | 23448517 | Mexican            | 128 | 7 | L444P - 7 | 252 |   |           | Only<br>scanned<br>the L444P<br>and<br>N370S<br>mutations              | AAO<45  |        |    |
|                                                   |          |                    |     |   |           |     |   |           |                                                                        | L444P   | severe | 36 |
|                                                   |          |                    |     |   |           |     |   |           |                                                                        | L444P   | severe | 28 |
|                                                   |          |                    |     |   |           |     |   |           |                                                                        | L444P   | severe | 44 |
|                                                   |          |                    |     |   |           |     |   |           |                                                                        | L444P   | severe | 43 |
|                                                   |          |                    |     |   |           |     |   |           |                                                                        | L444P   | severe | 29 |
|                                                   |          |                    |     |   |           |     |   |           |                                                                        | L444P   | severe | 42 |
|                                                   |          |                    |     |   |           |     |   |           |                                                                        | L444P   | severe | 42 |
